# Supplementary material for: Computational screen of M2P metal phosphides for catalytic ethane dehydrogenation
Source: Royal Society of Chemistry journal article supplement (doi:10.1039/d2cy00602b), 2022-01-01
Supplement: d2cy00602b1.pdf [file d2cy00602b1.pdf]

# Metal Phosphide Properties and Computational Screens for Ethane Dehydrogenation Catalyst

Jeonghyun Ko<sup>†</sup> and William F. Schneider<sup>\*,†,‡</sup>

<sup>†</sup>*Department of Chemical and Biomolecular Engineering, University of Notre Dame, Notre  
Dame, IN 46556, United States*

<sup>‡</sup>*Department of Chemistry and Biochemistry, University of Notre Dame, Notre Dame, IN  
46556, United States*

E-mail: wschneider@nd.edu

**Table S1: DFT-computed lattice constants.**

| Element | Hexagonal $M_2P$ |      |      | Orthorhombic $M_2P$ |      |      | Pure metal |      |      |
|---------|------------------|------|------|---------------------|------|------|------------|------|------|
|         | a                | b    | c    | a                   | b    | c    | a          | b    | c    |
| Fe      | 5.81             | 5.81 | 3.42 | 5.61                | 3.57 | 6.51 | 2.83       | 2.83 | 2.83 |
| Co      | 5.72             | 5.72 | 3.40 | 5.51                | 3.51 | 6.58 | 2.49       | 2.15 | 4.03 |
| Ni      | 5.88             | 5.88 | 3.37 | 5.72                | 3.54 | 6.68 | 3.52       | 3.52 | 3.52 |
| Cu      | 6.16             | 6.16 | 3.64 | 6.10                | 3.71 | 7.01 | 3.64       | 3.64 | 3.64 |
| Mo      | 6.75             | 6.75 | 3.25 | 5.92                | 4.04 | 7.32 | 3.16       | 3.16 | 3.16 |
| Ru      | 6.03             | 6.03 | 3.82 | 5.88                | 3.88 | 7.01 | 2.72       | 2.35 | 4.28 |
| Rh      | 6.10             | 6.10 | 3.79 | 5.88                | 3.88 | 7.08 | 3.82       | 3.82 | 3.82 |
| Pd      | 6.46             | 6.46 | 3.64 | 6.90                | 3.35 | 7.71 | 3.94       | 3.94 | 3.94 |
| Ag      | 6.80             | 6.80 | 4.00 | 6.54                | 4.08 | 7.95 | 4.15       | 4.15 | 4.15 |
| Pt      | 6.80             | 6.80 | 3.51 | 7.00                | 3.48 | 7.55 | 3.97       | 3.97 | 3.97 |

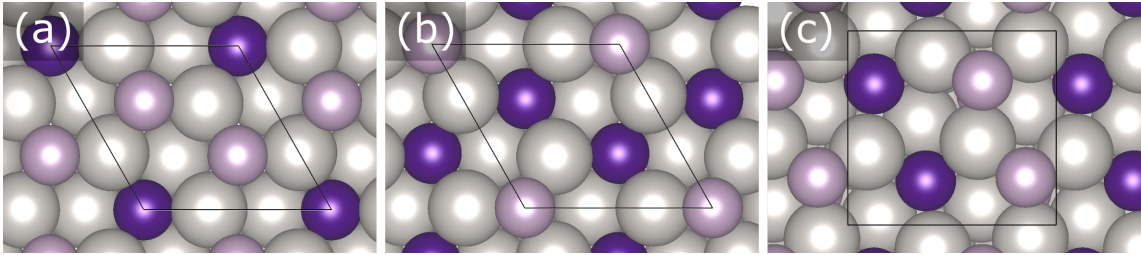

Figure S1: Top views of hexagonal (a)  $Pt_2P(001)$ -A, (a)  $Pt_2P(001)$ -B, and orthorhombic (c)  $Pt_2P(010)$  after geometry optimization. Computational supercells are indicated with light lines, Pt atoms shown in gray, P shown in lavender. Segregated P atoms from sublayer are colored by purple.

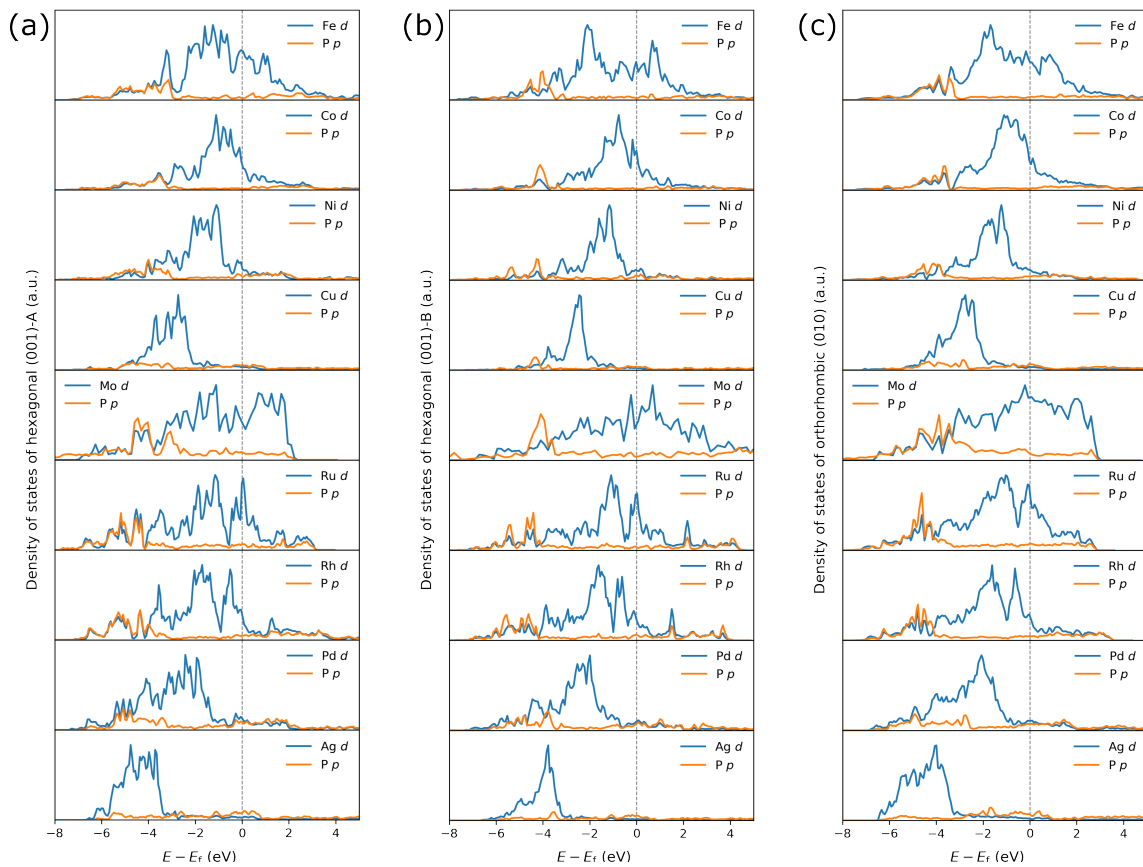

Figure S2: Atom-projected density of states (DOS) of (a, b) hexagonal (001)-A, B and (c) orthorhombic (010) surfaces. The  $p$  and  $d$  states on the metal and P are shown in blue and orange, respectively.

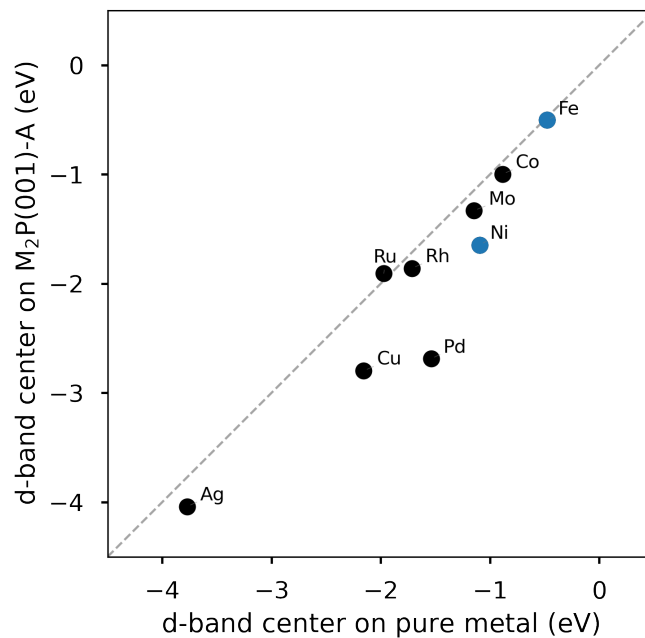

Figure S3: Parity plot of  $d$ -band centers ( $\epsilon_d$ ) of metallic sites on parent metal and  $M_2P(001)$ -A. Blue markers highlight compounds that are stable in the hexagonal  $M_2P$  structure.



**Table S2:**  $d$ -band centers ( $\varepsilon_d$ ) of parent metal and metal atoms on hexagonal  $M_2P(001)$ -A, B and orthorhombic (010).

| Metal element | Parent metal (eV) | Hexagonal (001)-A (eV) | Hexagonal (001)-B (eV) | Orthorhombic (010) (eV) |
|---------------|-------------------|------------------------|------------------------|-------------------------|
| Fe            | -0.48             | -0.50                  | -0.68                  | -0.57                   |
| Co            | -0.88             | -1.00                  | -0.67                  | -1.04                   |
| Ni            | -1.09             | -1.65                  | -1.72                  | -1.72                   |
| Cu            | -2.16             | -2.80                  | -2.48                  | -2.74                   |
| Mo            | -1.15             | -1.33                  | -0.32                  | -0.86                   |
| Ru            | -1.97             | -1.91                  | -1.32                  | -1.69                   |
| Rh            | -1.71             | -1.86                  | -1.81                  | -1.86                   |
| Pd            | -1.54             | -2.69                  | -2.36                  | -2.51                   |
| Ag            | -3.77             | -4.04                  | -3.75                  | -4.04                   |

**Table S3:** Adsorption energies ( $E_{\text{ads}}$ ) (eV) at  $M_3$ -centered site on metal surfaces.

| Surface | $E_{\text{ads}}(\text{H})$ | $E_{\text{ads}}(\text{C})$ | $E_{\text{ads}}(\text{CH})$ | $E_{\text{ads}}(\text{CH}_3)$ |
|---------|----------------------------|----------------------------|-----------------------------|-------------------------------|
| Fe(110) | -0.70                      | -8.03                      | -7.09                       | -2.17                         |
| Co(001) | -0.53                      | -7.04                      | -6.45                       | -1.98                         |
| Ni(111) | -0.55                      | -6.94                      | -6.56                       | -1.92                         |
| Cu(111) | -0.32                      | -5.26                      | -5.38                       | -1.53                         |
| Mo(110) | -0.67                      | -7.89                      | -7.36                       | -2.41                         |
| Ru(001) | -0.65                      | -7.80                      | -7.10                       | -2.19                         |
| Rh(111) | -0.54                      | -7.56                      | -7.00                       | -1.87                         |
| Pd(111) | -0.63                      | -7.24                      | -6.65                       | -1.63                         |
| Ag(111) | 0.04                       | -3.98                      | -4.13                       | -0.99                         |

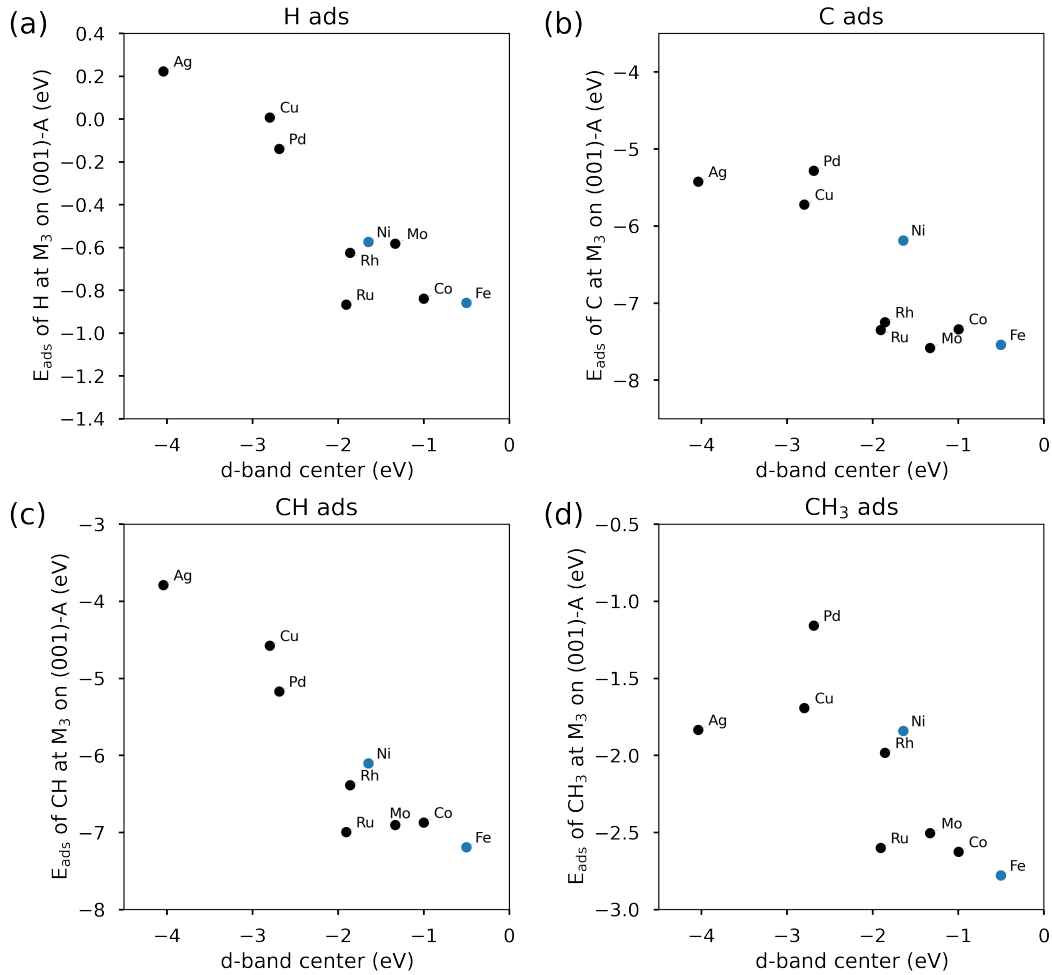

Figure S4: Adsorption energies of (a) H, (b) C, (c) CH and (d) CH<sub>3</sub> plotted against  $d$ -band centers ( $\varepsilon_d$ ) of metallic sites on on hexagonal M<sub>2</sub>P(001)- A. Blue markers highlight compounds that are stable in the hexagonal M<sub>2</sub>P structure.

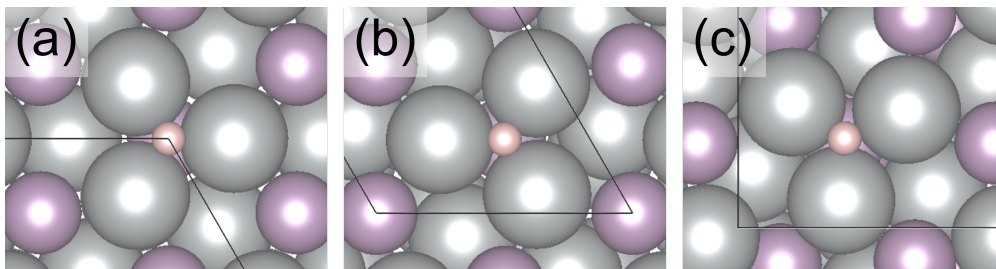

Figure S5: Adsorption geometry of H at M<sub>3</sub>-centered sites on hexagonal (a) Ag<sub>2</sub>P(001)-A, (b) Ag<sub>2</sub>P(001)-B, and orthorhombic (c) Ag<sub>2</sub>P(010). Computational supercells are indicated with light lines, H, Ag and P atoms are shown in light pink, gray and lavender.

**Table S4: Adsorption energies ( $E_{\text{ads}}$ ) (eV) at  $M_3$ -centered site on hexagonal  $M_2P(001)$ -A surfaces.**

| Surface                             | $E_{\text{ads}}(\text{H})$ | $E_{\text{ads}}(\text{C})$ | $E_{\text{ads}}(\text{CH})$ | $E_{\text{ads}}(\text{CH}_3)$ |
|-------------------------------------|----------------------------|----------------------------|-----------------------------|-------------------------------|
| $\text{Fe}_2\text{P}(001)\text{-A}$ | -0.86                      | -7.54                      | -7.19                       | -2.78                         |
| $\text{Co}_2\text{P}(001)\text{-A}$ | -0.84                      | -7.34                      | -6.87                       | -2.63                         |
| $\text{Ni}_2\text{P}(001)\text{-A}$ | -0.57                      | -6.19                      | -6.10                       | -1.84                         |
| $\text{Cu}_2\text{P}(001)\text{-A}$ | 0.01                       | -5.72                      | -4.58                       | -1.69                         |
| $\text{Mo}_2\text{P}(001)\text{-A}$ | -0.58                      | -7.58                      | -6.91                       | -2.50                         |
| $\text{Ru}_2\text{P}(001)\text{-A}$ | -0.87                      | -7.35                      | -7.00                       | -2.60                         |
| $\text{Rh}_2\text{P}(001)\text{-A}$ | -0.63                      | -7.25                      | -6.39                       | -1.98                         |
| $\text{Pd}_2\text{P}(001)\text{-A}$ | -0.14                      | -5.28                      | -5.17                       | -1.16                         |
| $\text{Ag}_2\text{P}(001)\text{-A}$ | 0.22                       | -5.43                      | -3.79                       | -1.84                         |

**Table S5: Adsorption energies ( $E_{\text{ads}}$ ) (eV) at  $M_3$ -centered site on hexagonal  $M_2P(001)$ -B surfaces.**

| Surface                             | $E_{\text{ads}}(\text{H})$ | $E_{\text{ads}}(\text{C})$ | $E_{\text{ads}}(\text{CH})$ | $E_{\text{ads}}(\text{CH}_3)$ |
|-------------------------------------|----------------------------|----------------------------|-----------------------------|-------------------------------|
| $\text{Fe}_2\text{P}(001)\text{-B}$ | -0.53                      | -7.02                      | -6.63                       | -2.18                         |
| $\text{Co}_2\text{P}(001)\text{-B}$ | -0.70                      | -7.44                      | -6.84                       | -2.21                         |
| $\text{Ni}_2\text{P}(001)\text{-B}$ | -0.16                      | -6.21                      | -5.85                       | -1.62                         |
| $\text{Cu}_2\text{P}(001)\text{-B}$ | -0.60                      | -5.95                      | -4.95                       | -1.48                         |
| $\text{Mo}_2\text{P}(001)\text{-B}$ | -0.93                      | -7.96                      | -7.38                       | -2.91                         |
| $\text{Ru}_2\text{P}(001)\text{-B}$ | -0.88                      | -7.86                      | -7.34                       | -2.20                         |
| $\text{Rh}_2\text{P}(001)\text{-B}$ | -0.67                      | -7.79                      | -6.61                       | -1.91                         |
| $\text{Pd}_2\text{P}(001)\text{-B}$ | -0.06                      | -5.73                      | –                           | -1.19                         |
| $\text{Ag}_2\text{P}(001)\text{-B}$ | -1.24                      | –                          | -4.43                       | -2.00                         |

**Table S6: Adsorption energies ( $E_{\text{ads}}$ ) (eV) at  $M_3$ -centered site on orthorhombic  $M_2P(010)$  surfaces.**

| Surface                | $E_{\text{ads}}(\text{H})$ | $E_{\text{ads}}(\text{C})$ | $E_{\text{ads}}(\text{CH})$ | $E_{\text{ads}}(\text{CH}_3)$ |
|------------------------|----------------------------|----------------------------|-----------------------------|-------------------------------|
| Fe <sub>2</sub> P(010) | -0.59                      | -7.18                      | -6.74                       | -2.31                         |
| Co <sub>2</sub> P(010) | -0.65                      | -7.20                      | -6.74                       | -2.27                         |
| Ni <sub>2</sub> P(010) | –                          | -5.93                      | -5.60                       | –                             |
| Cu <sub>2</sub> P(010) | –                          | -5.79                      | -4.58                       | –                             |
| Mo <sub>2</sub> P(010) | -0.94                      | -8.40                      | -7.73                       | -2.90                         |
| Ru <sub>2</sub> P(010) | -0.73                      | -7.37                      | -6.98                       | -2.16                         |
| Rh <sub>2</sub> P(010) | -0.58                      | -7.16                      | -6.51                       | -1.84                         |
| Pd <sub>2</sub> P(010) | –                          | –                          | -4.69                       | –                             |
| Ag <sub>2</sub> P(010) | 0.15                       | –                          | -4.32                       | –                             |

**Table S7: Adsorption energies ( $E_{\text{ads}}$ ) (eV) at P-centered site on hexagonal and orthorhombic  $M_2P$  surfaces.**

| Surface                  | $E_{\text{ads}}(\text{CH}_3)$ | Surface                  | $E_{\text{ads}}(\text{CH}_3)$ | Surface                | $E_{\text{ads}}(\text{CH}_3)$ |
|--------------------------|-------------------------------|--------------------------|-------------------------------|------------------------|-------------------------------|
| Fe <sub>2</sub> P(001)-A | -1.40                         | Fe <sub>2</sub> P(001)-B | -1.43                         | Fe <sub>2</sub> P(010) | -2.31                         |
| Co <sub>2</sub> P(001)-A | -1.34                         | Co <sub>2</sub> P(001)-B | -1.25                         | Co <sub>2</sub> P(010) | -1.27                         |
| Ni <sub>2</sub> P(001)-A | -1.90                         | Ni <sub>2</sub> P(001)-B | -1.71                         | Ni <sub>2</sub> P(010) | -1.67                         |
| Cu <sub>2</sub> P(001)-A | -2.38                         | Cu <sub>2</sub> P(001)-B | -1.96                         | Cu <sub>2</sub> P(010) | -2.58                         |
| Mo <sub>2</sub> P(001)-A | -1.45                         | Mo <sub>2</sub> P(001)-B | -1.70                         | Mo <sub>2</sub> P(010) | –                             |
| Ru <sub>2</sub> P(001)-A | -1.74                         | Ru <sub>2</sub> P(001)-B | -1.16                         | Ru <sub>2</sub> P(010) | -1.72                         |
| Rh <sub>2</sub> P(001)-A | -1.46                         | Rh <sub>2</sub> P(001)-B | -1.47                         | Rh <sub>2</sub> P(010) | -1.38                         |
| Pd <sub>2</sub> P(001)-A | -2.28                         | Pd <sub>2</sub> P(001)-B | -2.18                         | Pd <sub>2</sub> P(010) | -3.08                         |
| Ag <sub>2</sub> P(001)-A | -2.75                         | Ag <sub>2</sub> P(001)-B | -2.55                         | Ag <sub>2</sub> P(010) | -2.53                         |

**Table S8: Vibrational frequencies ( $\text{cm}^{-1}$ ) of transition states for ethylene dehydrogenation ( $\text{CH}_2\text{CH}_2^* + * \rightarrow \text{C}_2\text{H}_3^* + \text{H}^*$ ) on hexagonal  $\text{Fe}_2\text{P}(001)\text{-A}$ .**

| Normal mode | Vibrational frequency ( $\text{cm}^{-1}$ ) |        |
|-------------|--------------------------------------------|--------|
|             | path 1                                     | path 2 |
| 1           | 3120                                       | 3056   |
| 2           | 3037                                       | 3023   |
| 3           | 2025                                       | 2087   |
| 4           | 1945                                       | 1920   |
| 5           | 1425                                       | 1509   |
| 6           | 1359                                       | 1211   |
| 7           | 1241                                       | 1139   |
| 8           | 993                                        | 1024   |
| 9           | 887                                        | 865    |
| 10          | 723                                        | 816    |
| 11          | 687                                        | 756    |
| 12          | 553                                        | 577    |
| 13          | 419                                        | 438    |
| 14          | 396                                        | 364    |
| 15          | 346                                        | 331    |
| 16          | 265                                        | 269    |
| 17          | 167                                        | 231    |
| 18          | 482 i                                      | 285 i  |

**Table S9: Vibrational frequencies ( $\text{cm}^{-1}$ ) of transition states for ethylene dehydrogenation ( $\text{CH}_2\text{CH}_2^* + * \rightarrow \text{C}_2\text{H}_3^* + \text{H}^*$ ) on hexagonal  $\text{Ni}_2\text{P}(001)\text{-A}$ .**

| Normal mode | Vibrational frequency ( $\text{cm}^{-1}$ ) |        |
|-------------|--------------------------------------------|--------|
|             | path 1                                     | path 2 |
| 1           | 3039                                       | 3122   |
| 2           | 3007                                       | 3035   |
| 3           | 2976                                       | 2787   |
| 4           | 1905                                       | 1931   |
| 5           | 1380                                       | 1445   |
| 6           | 1124                                       | 1259   |
| 7           | 1052                                       | 1147   |
| 8           | 1009                                       | 922    |
| 9           | 951                                        | 895    |
| 10          | 911                                        | 788    |
| 11          | 663                                        | 630    |
| 12          | 602                                        | 462    |
| 13          | 574                                        | 448    |
| 14          | 414                                        | 340    |
| 15          | 370                                        | 249    |
| 16          | 283                                        | 200    |
| 17          | 189                                        | 114    |
| 18          | 730 i                                      | 678 i  |

**Table S10: Vibrational frequencies ( $\text{cm}^{-1}$ ) of transition states for ethylene dehydrogenation ( $\text{CH}_2\text{CH}_2^* + * \rightarrow \text{C}_2\text{H}_3^* + \text{H}^*$ ) on hexagonal  $\text{Pd}_2\text{P}(001)\text{-A}$ .**

| Normal mode | Vibrational frequency ( $\text{cm}^{-1}$ ) |        |        |
|-------------|--------------------------------------------|--------|--------|
|             | Path 1                                     | Path 2 | Path 3 |
| 1           | 3129                                       | 3128   | 3112   |
| 2           | 3073                                       | 3061   | 3031   |
| 3           | 3039                                       | 3033   | 2995   |
| 4           | 1568                                       | 1570   | 1418   |
| 5           | 1359                                       | 1449   | 1277   |
| 6           | 1196                                       | 1323   | 1211   |
| 7           | 1171                                       | 1155   | 1174   |
| 8           | 954                                        | 1019   | 960    |
| 9           | 939                                        | 927    | 889    |
| 10          | 879                                        | 868    | 841    |
| 11          | 679                                        | 704    | 635    |
| 12          | 591                                        | 481    | 570    |
| 13          | 422                                        | 386    | 510    |
| 14          | 256                                        | 207    | 347    |
| 15          | 219                                        | 150    | 290    |
| 16          | 80                                         | 104    | 152    |
| 17          | 49                                         | 52     | 110    |
| 18          | 310 i                                      | 1005 i | 914 i  |

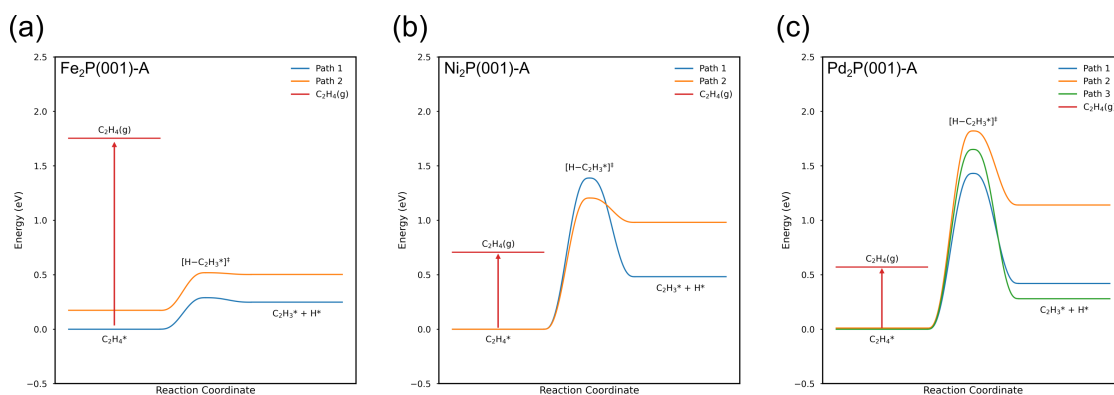

Figure S6: Energy profiles of ethylene dehydrogenation pathways vs ethylene desorption on hexagonal (a)  $\text{Fe}_2\text{P}(001)\text{-A}$ , (b)  $\text{Ni}_2\text{P}(001)\text{-A}$ , and (c)  $\text{Pd}_2\text{P}(001)\text{-A}$ .

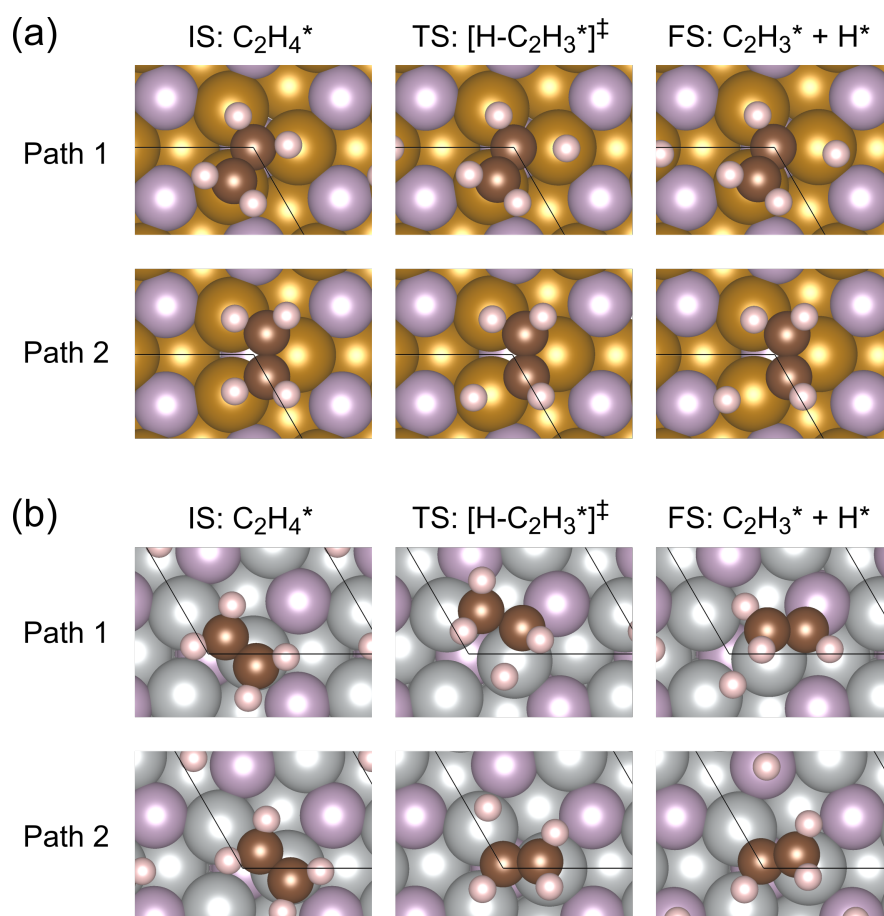

Figure S7: Geometric structures of initial state (IS), transition state (TS) and final state (FS) of possible ethylene dehydrogenation pathways on (a)  $\text{Fe}_2\text{P}(001)\text{-A}$  and (b)  $\text{Ni}_2\text{P}(001)\text{-A}$ .
